# Supplementary material for: The Prognostic Value of Toll-Like Receptors in Head and Neck Squamous Cell Carcinoma: A Systematic Review and Meta-Analysis
Source: MDPI journal article supplement (doi:10.3390/ijms21197255), 2020-09-30
Supplement: s1 [file s1]

# The Prognostic Value of Toll-Like Receptors in Head and Neck Squamous Cell Carcinoma: A Systematic Review and Meta-Analysis

**Table S1.** Evaluation criteria used to assess the reporting quality.

| Checklist Items                 | Criteria <sup>†</sup>                                                                                                                                                                                                                    |
|---------------------------------|------------------------------------------------------------------------------------------------------------------------------------------------------------------------------------------------------------------------------------------|
| 1. Patient samples              | Cohort (retrospective or prospective) study with a well-defined study population with information such as the number of the studied patients, source of sample, study period, follow-up time.                                            |
| 2. Clinical data of the cohort  | The basic clinical data including gender, age, clinical stage of cancer and histopathological grade, was provided.                                                                                                                       |
| 3. Immunohistochemistry         | Well-described staining protocol or referred to original paper with information such as primary antibody name, dilution, company. The cut-off value of the area stained after which it is to be considered positive, was well described. |
| 4. Prognostics                  | The endpoints of the survival analyses were defined (e.g., overall survival, disease-free survival).                                                                                                                                     |
| 5. Statistics                   | Estimated effects (HR, CI) were describing the relationship between the evaluated TLR(s) and the outcome was provided. Adequate statistical analysis (e.g., Cox regression modelling) was performed.                                     |
| 6. Classical prognostic factors | The prognostic value of the classical prognostic factors was reported. The relationship between the evaluated TLR(s) and classical prognostic factors were reported.                                                                     |

HR, hazard ratio; CI, confidence intervals. <sup>†</sup> Adapted from the Reporting Recommendations for Tumor Marker Prognostic Studies (REMARK) guidelines [1].

**Table S2.** Risk of bias appraisal and evaluation \*.

| Study | Q1 | Q2 | Q3 | Q4 | Q5 | Q6 | Q7 | Q8  | Q9  | Q10 | %    | Risk of Bias |
|-------|----|----|----|----|----|----|----|-----|-----|-----|------|--------------|
| [10]  | Y  | Y  | Y  | Y  | Y  | Y  | Y  | N/A | N/A | Y   | 100  | L            |
| [12]  | N  | Y  | Y  | Y  | U  | Y  | Y  | N/A | N/A | N   | 62.5 | M            |
| [17]  | Y  | Y  | Y  | Y  | Y  | Y  | Y  | N/A | N/A | Y   | 100  | L            |
| [18]  | Y  | Y  | Y  | Y  | U  | Y  | Y  | N/A | N/A | N   | 75   | L            |
| [11]  | Y  | Y  | Y  | Y  | Y  | Y  | Y  | N/A | N/A | Y   | 100  | L            |
| [13]  | Y  | Y  | Y  | Y  | U  | Y  | Y  | N/A | N/A | N   | 75   | L            |
| [22]  | Y  | Y  | Y  | Y  | U  | Y  | Y  | N/A | N/A | N   | 75   | L            |
| [14]  | Y  | Y  | Y  | Y  | U  | N  | Y  | N/A | N/A | Y   | 75   | L            |
| [19]  | N  | Y  | Y  | Y  | U  | Y  | Y  | N/A | N/A | Y   | 75   | L            |
| [20]  | Y  | Y  | Y  | Y  | Y  | Y  | Y  | N/A | N/A | N   | 87.5 | L            |
| [15]  | Y  | Y  | Y  | Y  | Y  | Y  | Y  | N/A | N/A | N   | 87.5 | L            |
| [16]  | Y  | Y  | Y  | N  | Y  | Y  | Y  | N/A | N/A | Y   | 87.5 | L            |
| [21]  | N  | Y  | Y  | Y  | U  | Y  | Y  | N/A | N/A | N   | 62.5 | M            |

\* The evaluation was performed according to the (Meta-Analysis of Statistics Assessment and Review Instrument critical) appraisal tool as recently described [2]. The percentage indicates the “yes” score. Y = Yes, N = No, U = Unclear, NA = Not applicable (which was not considered on the percentage calculation).

## References

1. McShane, L.M.; Altman, D.G.; Sauerbrei, W.; Taube, S.E.; Gion, M.; Clark, G.M. Statistics subcommittee of the nci-eortc working group on cancer diagnostics. Reporting recommendations for tumour MARKer prognostic studies (REMARK). *Br. J. Cancer* **2005**, *93*, 387–391.
2. Hujanen, R.; Almahmoudi, R.; Karinen, S.; Nwaru, B.I.; Salo, T.; Salem, A. Vasculogenic mimicry: A promising prognosticator in head and neck squamous cell carcinoma and esophageal cancer? A systematic review and meta-analysis. *Cells* **2020**, *9*, 507.
